# Supplementary material
Source: MDPI journal article supplement (https://www.mdpi.com/2073-4433/8/3/47)
Supplement: s1 [file s1]

# Supplementary Materials: Morphology, Composition, and Mixing State of Individual Aerosol Particles in Northeast China during Wintertime

Liang Xu, Lei Liu, Jian Zhang, YinXiao Zhang, Yong Ren, Xin Wang and Weijun Li

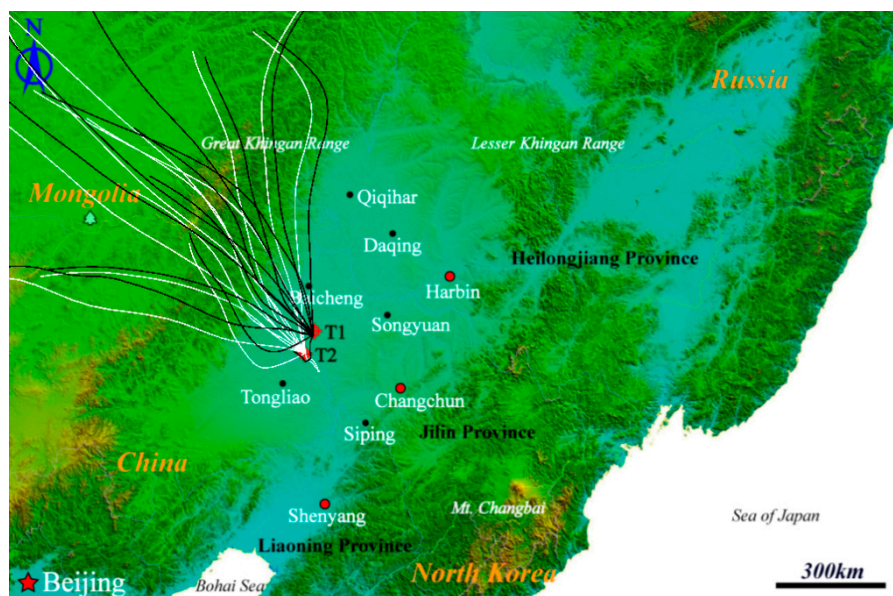

Figure S1. 48h air mass backward trajectory for T1 and T2 sites during our sampling period.

Haze forecast map at 3 February, 2015  
(China Meteorological Administration)

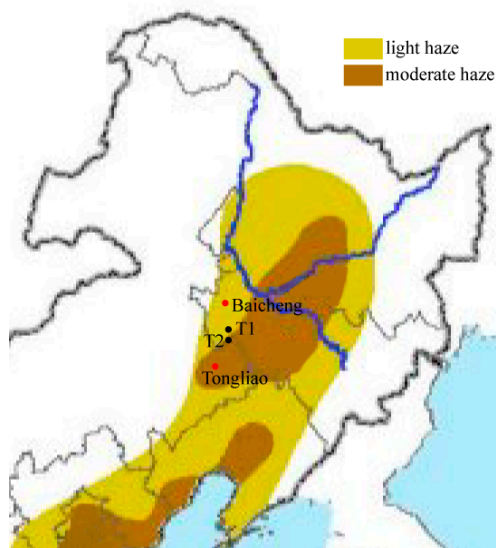

Figure S2. China Meteorological Administration haze forecast map at 3 February, 2015.

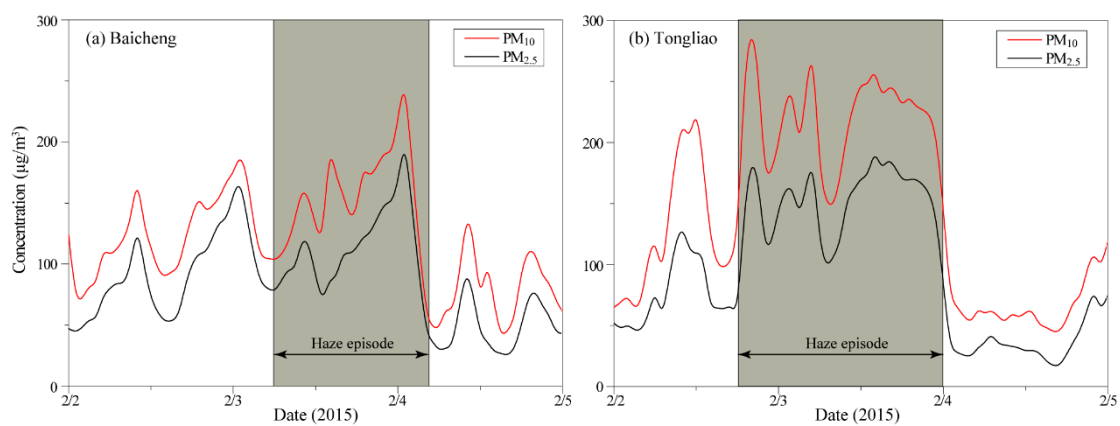

**Figure S3.** PM concentration for Baicheng (a) and Tongliao (b), two cities which were close to our sampling sites.

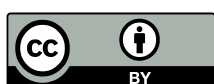

© 2017 by the authors; licensee MDPI, Basel, Switzerland. This article is an open access article distributed under the terms and conditions of the Creative Commons Attribution (CC BY) license (<http://creativecommons.org/licenses/by/4.0/>).
